# Supplementary material for: Impact of Geography and Climate on the Genetic Differentiation of the Subtropical Pine Pinus yunnanensis
Source: PubMed Central journal article supplement (PMC3693954; doi:10.1371/journal.pone.0067345), 2013-06-26
Supplement: pone.0067345.s002.pdf [file pone.0067345.s002.pdf]

Table S1. 148 occurrence records for *Pinus yunnanensis*, with the corresponding 14 environmental variables. The eight variables used in ecological niche modeling are indicated in bold.

| No. | Longitude (E) | Latitude (N) | Altitude (m) | TwoStep | Environmental variables |      |             |             |             |              |       |              |                    |             |                    |                    |             |             |
|-----|---------------|--------------|--------------|---------|-------------------------|------|-------------|-------------|-------------|--------------|-------|--------------|--------------------|-------------|--------------------|--------------------|-------------|-------------|
|     |               |              |              |         | bio1                    | bio2 | <b>bio3</b> | <b>bio4</b> | <b>bio5</b> | <b>bio12</b> | bio14 | <b>bio15</b> | wet                | vap         | <b>sph</b>         | <b>sc</b>          | gdd         | frs         |
| 1   | 98.3          | 25.31667     | 1782         | 1       | 149                     | 112  | <b>48</b>   | <b>4292</b> | <b>231</b>  | <b>1573</b>  | 16    | <b>77</b>    | <b>17.02000046</b> | 14.47999954 | <b>5.620999813</b> | <b>6.28000021</b>  | 3110.600098 | 4.010000229 |
| 2   | 98.35         | 25.1         | 1635         | 1       | 158                     | 113  | <b>48</b>   | <b>4265</b> | <b>242</b>  | <b>1562</b>  | 18    | <b>78</b>    | <b>17.37000084</b> | 14.17000008 | <b>5.785999775</b> | <b>5.324999809</b> | 3262.419922 | 4.099999905 |
| 3   | 98.46133      | 25.32508     | 1908         | 1       | 150                     | 112  | <b>48</b>   | <b>4325</b> | <b>233</b>  | <b>1483</b>  | 17    | <b>77</b>    | <b>17.86000061</b> | 13.35000038 | <b>5.952000141</b> | <b>5.471000195</b> | 3026.189941 | 4.739999771 |
| 4   | 98.65         | 25.03333     | 1629         | 1       | 160                     | 114  | <b>48</b>   | <b>4361</b> | <b>245</b>  | <b>1372</b>  | 19    | <b>76</b>    | <b>17.86000061</b> | 14.05000019 | <b>6.40899992</b>  | <b>4.149000168</b> | 3384.030029 | 4.059999943 |
| 5   | 98.68333      | 25.16667     | 1627         | 1       | 160                     | 114  | <b>48</b>   | <b>4394</b> | <b>246</b>  | <b>1351</b>  | 19    | <b>74</b>    | <b>17.93000031</b> | 13.56999969 | <b>6.422999859</b> | <b>4.183000088</b> | 3127.469971 | 4.440000057 |
| 6   | 98.75         | 25.85        | 2597         | 1       | 137                     | 111  | <b>48</b>   | <b>4342</b> | <b>222</b>  | <b>1363</b>  | 13    | <b>81</b>    | <b>17.30999947</b> | 11.85999966 | <b>6.56099987</b>  | <b>4.842000008</b> | 2199.800049 | 5.789999962 |
| 7   | 98.76667      | 24.95        | 2089         | 1       | 140                     | 114  | <b>49</b>   | <b>4315</b> | <b>225</b>  | <b>1277</b>  | 16    | <b>78</b>    | <b>17.72999954</b> | 14.34000015 | <b>6.611999989</b> | <b>3.848999977</b> | 3569.5      | 3.759999999 |
| 8   | 98.78333      | 24.63333     | 1828         | 1       | 151                     | 116  | <b>49</b>   | <b>4221</b> | <b>238</b>  | <b>1314</b>  | 16    | <b>80</b>    | <b>17.22999954</b> | 14.64999962 | <b>6.418000221</b> | <b>3.954999924</b> | 3931.129883 | 3.400000095 |
| 9   | 98.8          | 25.16667     | 1864         | 1       | 165                     | 114  | <b>48</b>   | <b>4427</b> | <b>251</b>  | <b>1266</b>  | 18    | <b>73</b>    | <b>17.90999985</b> | 13.60999966 | <b>6.607999802</b> | <b>3.834000111</b> | 3182.300049 | 4.360000134 |
| 10  | 98.82419      | 25.96578     | 1503         | 1       | 175                     | 110  | <b>47</b>   | <b>4386</b> | <b>261</b>  | <b>1473</b>  | 19    | <b>69</b>    | <b>17.04999924</b> | 11.35999966 | <b>6.629000187</b> | <b>4.915999889</b> | 2030.050049 | 6.170000076 |
| 11  | 98.83333      | 26.15        | 1705         | 1       | 168                     | 110  | <b>47</b>   | <b>4461</b> | <b>255</b>  | <b>1479</b>  | 17    | <b>72</b>    | <b>16.65999985</b> | 10.59000015 | <b>6.563000202</b> | <b>5.276000023</b> | 1746.5      | 6.900000095 |
| 12  | 98.85         | 24.58333     | 2025         | 1       | 146                     | 115  | <b>49</b>   | <b>4227</b> | <b>232</b>  | <b>1287</b>  | 15    | <b>80</b>    | <b>17.28000069</b> | 14.52000046 | <b>6.285999775</b> | <b>3.937000036</b> | 3941.469971 | 3.450000048 |
| 13  | 98.87247      | 26.20326     | 1316         | 1       | 185                     | 109  | <b>47</b>   | <b>4418</b> | <b>273</b>  | <b>1563</b>  | 19    | <b>66</b>    | <b>16.54000092</b> | 10.05000019 | <b>6.606999874</b> | <b>5.229000092</b> | 1670.27002  | 7.380000114 |
| 14  | 99.01667      | 25.86667     | 1530         | 1       | 174                     | 112  | <b>48</b>   | <b>4407</b> | <b>262</b>  | <b>1318</b>  | 19    | <b>68</b>    | <b>17.23999977</b> | 10.72999954 | <b>7.021999836</b> | <b>4.175000191</b> | 2212.669922 | 6.590000153 |
| 15  | 99.067        | 25.684       | 2199         | 1       | 142                     | 112  | <b>48</b>   | <b>4381</b> | <b>230</b>  | <b>1213</b>  | 15    | <b>77</b>    | <b>17.5</b>        | 11.48999977 | <b>7.140999794</b> | <b>3.884000063</b> | 2528.070068 | 5.929999828 |
| 16  | 99.08333      | 24.86667     | 1673         | 1       | 161                     | 115  | <b>48</b>   | <b>4392</b> | <b>250</b>  | <b>1110</b>  | 16    | <b>75</b>    | <b>17.57999992</b> | 14.40999985 | <b>6.401000023</b> | <b>3.734999895</b> | 3754.629883 | 3.539999962 |
| 17  | 99.13807      | 24.47679     | 1926         | 1       | 150                     | 115  | <b>49</b>   | <b>4217</b> | <b>238</b>  | <b>1212</b>  | 15    | <b>81</b>    | <b>17.15999985</b> | 14.60999966 | <b>6.085999966</b> | <b>3.703999996</b> | 4121.450195 | 3.200000048 |
| 18  | 99.2          | 26.73333     | 2752         | 1       | 104                     | 109  | <b>47</b>   | <b>4511</b> | <b>196</b>  | <b>1109</b>  | 8     | <b>88</b>    | <b>15.47000027</b> | 6.840000153 | <b>6.797999859</b> | <b>3.895999908</b> | 1109        | 10.34000015 |
| 19  | 99.2029       | 24.7191      | 1647         | 1       | 163                     | 116  | <b>49</b>   | <b>4323</b> | <b>253</b>  | <b>1118</b>  | 16    | <b>77</b>    | <b>17.27000046</b> | 14.51000023 | <b>6.070000172</b> | <b>3.663000107</b> | 3834.320068 | 3.319999933 |
| 20  | 99.25         | 24.61667     | 1818         | 1       | 152                     | 115  | <b>49</b>   | <b>4270</b> | <b>241</b>  | <b>1138</b>  | 15    | <b>80</b>    | <b>17.09000015</b> | 14.71000004 | <b>6.038000107</b> | <b>3.612999916</b> | 3974.25     | 3.099999905 |
| 21  | 99.25         | 25.999       | 2926         | 1       | 111                     | 110  | <b>48</b>   | <b>4345</b> | <b>198</b>  | <b>1167</b>  | 10    | <b>86</b>    | <b>16.70000076</b> | 10.18999958 | <b>7.352000237</b> | <b>3.588999987</b> | 2088.5      | 6.809999943 |
| 22  | 99.32004      | 26.59541     | 2875         | 1       | 107                     | 109  | <b>47</b>   | <b>4470</b> | <b>199</b>  | <b>1106</b>  | 8     | <b>88</b>    | <b>15.56999969</b> | 7.380000114 | <b>6.872000217</b> | <b>3.727999926</b> | 1272.27002  | 9.619999886 |
| 23  | 99.35         | 25.81667     | 1779         | 1       | 170                     | 112  | <b>48</b>   | <b>4441</b> | <b>261</b>  | <b>1144</b>  | 17    | <b>69</b>    | <b>16.76000023</b> | 11.22999954 | <b>7.388999939</b> | <b>3.602999926</b> | 2286.189941 | 5.920000076 |
| 24  | 99.35688      | 26.4795      | 2546         | 1       | 127                     | 110  | <b>48</b>   | <b>4458</b> | <b>218</b>  | <b>1145</b>  | 10    | <b>85</b>    | <b>15.68999958</b> | 7.940000057 | <b>6.923999786</b> | <b>3.769000053</b> | 1430.599976 | 8.970000267 |
| 25  | 99.4          | 26.16667     | 2145         | 1       | 148                     | 111  | <b>48</b>   | <b>4407</b> | <b>238</b>  | <b>1156</b>  | 13    | <b>78</b>    | <b>16.20000076</b> | 9.340000153 | <b>7.116000175</b> | <b>3.812999964</b> | 1843.339966 | 7.5         |
| 26  | 99.42936      | 25.89479     | 2107         | 1       | 148                     | 111  | <b>48</b>   | <b>4405</b> | <b>237</b>  | <b>1127</b>  | 14    | <b>78</b>    | <b>16.56999969</b> | 10.80000019 | <b>7.288000107</b> | <b>3.703000069</b> | 2167.090088 | 6.190000057 |
| 27  | 99.55         | 26.7         | 2601         | 1       | 115                     | 111  | <b>48</b>   | <b>4489</b> | <b>209</b>  | <b>1064</b>  | 7     | <b>91</b>    | <b>15.28999996</b> | 6.820000172 | <b>6.478000164</b> | <b>3.894999981</b> | 1115.900024 | 10.06999969 |
| 28  | 99.6          | 26           | 2508         | 1       | 128                     | 111  | <b>49</b>   | <b>4353</b> | <b>218</b>  | <b>1100</b>  | 11    | <b>86</b>    | <b>16.20999908</b> | 9.899999619 | <b>7.084000111</b> | <b>3.915999889</b> | 2009.400024 | 6.760000229 |
| 29  | 99.67116      | 25.40889     | 2423         | 1       | 130                     | 111  | <b>49</b>   | <b>4265</b> | <b>218</b>  | <b>1080</b>  | 14    | <b>82</b>    | <b>16.47999954</b> | 13.5        | <b>7.210000038</b> | <b>3.846999884</b> | 3261.219971 | 3.829999924 |

Continued Table S1

| No. | Longitude (E) | Latitude (N) | Altitude (m) | TwoStep | Environmental variables |      |           |             |            |             |       |           |                    |             |                    |                    |             |              |
|-----|---------------|--------------|--------------|---------|-------------------------|------|-----------|-------------|------------|-------------|-------|-----------|--------------------|-------------|--------------------|--------------------|-------------|--------------|
|     |               |              |              |         | bio1                    | bio2 | bio3      | bio4        | bio5       | bio12       | bio14 | bio15     | wet                | vap         | sph                | sc                 | gdd         | frs          |
| 30  | 99.76667      | 26.1         | 1889         | 1       | 160                     | 112  | <b>48</b> | <b>4409</b> | <b>253</b> | <b>1065</b> | 14    | <b>77</b> | <b>15.76000023</b> | 9.199999809 | <b>6.868999958</b> | <b>4.131999969</b> | 1944.76001  | 7.300000191  |
| 31  | 99.85         | 26.3         | 2141         | 1       | 147                     | 112  | <b>48</b> | <b>4381</b> | <b>240</b> | <b>1049</b> | 10    | <b>84</b> | <b>15.32999992</b> | 8.399999619 | <b>6.665999889</b> | <b>4.212999821</b> | 2016.699951 | 8.050000191  |
| 32  | 99.93333      | 25.98333     | 2237         | 1       | 142                     | 111  | <b>48</b> | <b>4335</b> | <b>235</b> | <b>1053</b> | 12    | <b>85</b> | <b>15.63000011</b> | 9.399999619 | <b>6.876999855</b> | <b>4.152999878</b> | 2512.120117 | 6.960000038  |
| 33  | 99.95         | 26.86667     | 1864         | 1       | 165                     | 115  | <b>48</b> | <b>4519</b> | <b>262</b> | <b>1012</b> | 10    | <b>79</b> | <b>14.85999966</b> | 5.489999771 | <b>6.217999935</b> | <b>3.881999969</b> | 1165.699951 | 11.34000015  |
| 34  | 99.96667      | 24.83333     | 2297         | 1       | 137                     | 111  | <b>49</b> | <b>4112</b> | <b>225</b> | <b>1080</b> | 14    | <b>83</b> | <b>16.52000046</b> | 12.72999954 | <b>6.428999901</b> | <b>3.892999887</b> | 3830.639893 | 4.139999866  |
| 35  | 99.96667      | 25.08333     | 1500         | 1       | 180                     | 114  | <b>48</b> | <b>4271</b> | <b>275</b> | <b>986</b>  | 15    | <b>76</b> | <b>16.32999992</b> | 12.85999966 | <b>6.81099987</b>  | <b>3.812000036</b> | 3813.330078 | 4.019999981  |
| 36  | 100.0333      | 25.7         | 2142         | 1       | 147                     | 111  | <b>48</b> | <b>4281</b> | <b>242</b> | <b>1047</b> | 14    | <b>83</b> | <b>15.59000015</b> | 11.60999966 | <b>6.940999985</b> | <b>4.138000011</b> | 2966.300049 | 4.920000076  |
| 37  | 100.0833      | 25.98333     | 2136         | 1       | 148                     | 112  | <b>48</b> | <b>4323</b> | <b>243</b> | <b>1034</b> | 12    | <b>85</b> | <b>15.31000042</b> | 9.640000343 | <b>6.78399992</b>  | <b>4.244999886</b> | 2960        | 6.539999962  |
| 38  | 100.131       | 25.68548     | 2608         | 1       | 123                     | 111  | <b>49</b> | <b>4235</b> | <b>214</b> | <b>1058</b> | 11    | <b>89</b> | <b>15.39000034</b> | 11.82999992 | <b>6.848999977</b> | <b>4.21999979</b>  | 3203.300049 | 4.599999905  |
| 39  | 100.1668      | 25.25421     | 2357         | 1       | 135                     | 111  | <b>48</b> | <b>4189</b> | <b>227</b> | <b>1049</b> | 13    | <b>86</b> | <b>15.67000008</b> | 13.13000011 | <b>6.953000069</b> | <b>3.654000044</b> | 3811.090088 | 3.549999952  |
| 40  | 100.1833      | 25.1667      | 2206         | 1       | 138                     | 111  | <b>49</b> | <b>4155</b> | <b>229</b> | <b>1047</b> | 13    | <b>85</b> | <b>15.72999954</b> | 13.17000008 | <b>6.794000149</b> | <b>3.72300005</b>  | 3868.620117 | 3.539999962  |
| 41  | 100.1833      | 26.15        | 2059         | 1       | 153                     | 113  | <b>49</b> | <b>4341</b> | <b>249</b> | <b>1008</b> | 11    | <b>85</b> | <b>14.81000042</b> | 9.720000267 | <b>6.679999828</b> | <b>4.27699995</b>  | 3266.909912 | 6.349999905  |
| 42  | 100.2         | 25.01667     | 1976         | 1       | 165                     | 112  | <b>48</b> | <b>4171</b> | <b>259</b> | <b>997</b>  | 15    | <b>81</b> | <b>15.80000019</b> | 13.28999996 | <b>6.472000122</b> | <b>3.903000116</b> | 3979.629883 | 3.480000019  |
| 43  | 100.3034      | 25.22222     | 1710         | 1       | 172                     | 113  | <b>48</b> | <b>4215</b> | <b>268</b> | <b>972</b>  | 14    | <b>80</b> | <b>15.38000011</b> | 13.31000042 | <b>6.734000206</b> | <b>3.723999977</b> | 3857.679932 | 3.289999962  |
| 44  | 99.32483      | 27.19582     | 2426         | 2       | 129                     | 111  | <b>47</b> | <b>4659</b> | <b>226</b> | <b>1100</b> | 8     | <b>85</b> | <b>14.63000011</b> | 6.110000134 | <b>6.355000019</b> | <b>5.300000191</b> | 1336.98999  | 11.18999958  |
| 45  | 99.43         | 26.95        | 2893         | 2       | 106                     | 110  | <b>47</b> | <b>4596</b> | <b>202</b> | <b>1043</b> | 7     | <b>90</b> | <b>15.13000011</b> | 5.619999886 | <b>6.468999863</b> | <b>4.276000023</b> | 1178.890015 | 11.56999969  |
| 46  | 99.46607      | 27.6         | 2471         | 2       | 126                     | 114  | <b>47</b> | <b>4789</b> | <b>228</b> | <b>991</b>  | 7     | <b>87</b> | <b>13.81000042</b> | 6.5         | <b>6.340000153</b> | <b>5.190000057</b> | 1259.150024 | 10.890000034 |
| 47  | 99.46667      | 27.2         | 2507         | 2       | 125                     | 112  | <b>47</b> | <b>4638</b> | <b>223</b> | <b>1043</b> | 7     | <b>88</b> | <b>14.63000011</b> | 5.71999979  | <b>6.281000137</b> | <b>4.721000195</b> | 1329.310059 | 11.52999973  |
| 48  | 99.509        | 28.015       | 3225         | 2       | 78                      | 140  | <b>48</b> | <b>5185</b> | <b>195</b> | <b>906</b>  | 3     | <b>96</b> | <b>13.53999996</b> | 4.320000172 | <b>6.225999832</b> | <b>5.913000107</b> | 932.2700195 | 14.02000046  |
| 49  | 99.5764       | 28.02422     | 3320         | 2       | 78                      | 140  | <b>48</b> | <b>5181</b> | <b>194</b> | <b>904</b>  | 3     | <b>96</b> | <b>13.53999996</b> | 4.320000172 | <b>6.225999832</b> | <b>5.913000107</b> | 932.2700195 | 14.02000046  |
| 50  | 99.65         | 27.1333      | 2312         | 2       | 139                     | 113  | <b>47</b> | <b>4587</b> | <b>236</b> | <b>1039</b> | 7     | <b>88</b> | <b>14.71000004</b> | 5.340000153 | <b>6.204999924</b> | <b>4.004000187</b> | 1277.680054 | 11.81000042  |
| 51  | 99.7167       | 26.7833      | 2720         | 2       | 114                     | 112  | <b>48</b> | <b>4490</b> | <b>209</b> | <b>1023</b> | 6     | <b>94</b> | <b>15.06999969</b> | 6.21999979  | <b>6.18900013</b>  | <b>3.983999968</b> | 1049.619995 | 10.64000034  |
| 52  | 99.8333       | 26.8667      | 2689         | 2       | 116                     | 113  | <b>48</b> | <b>4508</b> | <b>213</b> | <b>1002</b> | 5     | <b>96</b> | <b>14.94999981</b> | 5.599999905 | <b>6.175000191</b> | <b>3.903000116</b> | 1128.069946 | 11.28999996  |
| 53  | 99.85         | 26.65        | 2610         | 2       | 126                     | 113  | <b>48</b> | <b>4422</b> | <b>221</b> | <b>1025</b> | 6     | <b>94</b> | <b>14.98999977</b> | 6.880000114 | <b>6.302999973</b> | <b>4.048999786</b> | 1302        | 9.760000229  |
| 54  | 99.91667      | 26.43333     | 2371         | 2       | 135                     | 112  | <b>48</b> | <b>4403</b> | <b>229</b> | <b>1035</b> | 7     | <b>91</b> | <b>15.03999996</b> | 7.900000095 | <b>6.53000021</b>  | <b>4.147999763</b> | 1912.030029 | 8.510000229  |
| 55  | 99.91715      | 26.538       | 2198         | 2       | 145                     | 113  | <b>48</b> | <b>4431</b> | <b>240</b> | <b>1028</b> | 8     | <b>88</b> | <b>14.93000031</b> | 7.460000038 | <b>6.427000046</b> | <b>4.092000008</b> | 1650.079956 | 9.010000229  |
| 56  | 99.95536      | 26.76798     | 2650         | 2       | 120                     | 113  | <b>48</b> | <b>4447</b> | <b>216</b> | <b>1002</b> | 5     | <b>97</b> | <b>14.86999989</b> | 6.070000172 | <b>6.235000134</b> | <b>3.959000111</b> | 1169.619995 | 10.64000034  |
| 57  | 100.05        | 27.18        | 2202         | 2       | 135                     | 115  | <b>48</b> | <b>4584</b> | <b>233</b> | <b>996</b>  | 6     | <b>91</b> | <b>14.60000038</b> | 5.21999979  | <b>6.15199995</b>  | <b>3.671000004</b> | 1250.680054 | 11.85999966  |
| 58  | 100.2         | 26.5         | 2203         | 2       | 145                     | 114  | <b>49</b> | <b>4402</b> | <b>241</b> | <b>993</b>  | 7     | <b>93</b> | <b>14.18999958</b> | 9.260000229 | <b>6.500999928</b> | <b>4.090000153</b> | 2356.600098 | 6.860000134  |
| 59  | 100.2167      | 26.36667     | 1975         | 2       | 157                     | 114  | <b>48</b> | <b>4374</b> | <b>254</b> | <b>988</b>  | 9     | <b>86</b> | <b>14.34000015</b> | 9.590000153 | <b>6.574999809</b> | <b>4.175000191</b> | 2905.98999  | 6.46999979   |

Continued Table S1

| No. | Longitude (E) | Latitude (N) | Altitude (m) | TwoStep | Environmental variables |      |      |      |      |       |       |       |             |             |             |             |             |             |
|-----|---------------|--------------|--------------|---------|-------------------------|------|------|------|------|-------|-------|-------|-------------|-------------|-------------|-------------|-------------|-------------|
|     |               |              |              |         | bio1                    | bio2 | bio3 | bio4 | bio5 | bio12 | bio14 | bio15 | wet         | vap         | sph         | sc          | gdd         | frs         |
| 60  | 100.2364      | 26.88652     | 2508         | 2       | 126                     | 116  | 49   | 4468 | 225  | 972   | 3     | 102   | 14.31000042 | 6.21999979  | 6.30700016  | 3.823999882 | 1234.199951 | 10.39000034 |
| 61  | 100.2667      | 26.8         | 2395         | 2       | 134                     | 116  | 49   | 4459 | 234  | 975   | 3     | 101   | 14.18000031 | 7.159999847 | 6.330999851 | 3.915999889 | 1359.51001  | 9.300000191 |
| 62  | 100.3633      | 25.97407     | 2932         | 2       | 102                     | 112  | 49   | 4246 | 194  | 1052  | 8     | 96    | 14.60000038 | 11.02999973 | 6.602000237 | 4.46999979  | 3562.540039 | 4.809999943 |
| 63  | 100.4         | 25.96        | 1649         | 2       | 175                     | 115  | 48   | 4308 | 275  | 955   | 12    | 80    | 14.38000011 | 11.09000015 | 6.599999905 | 4.453999996 | 3606.199951 | 4.670000076 |
| 64  | 100.4729      | 24.89589     | 2041         | 2       | 155                     | 112  | 49   | 4091 | 247  | 1018  | 13    | 86    | 15.09000015 | 14.14999962 | 5.989999771 | 4.139999866 | 4083.689941 | 2.549999952 |
| 65  | 100.5         | 24.8         | 1960         | 2       | 167                     | 113  | 49   | 4068 | 260  | 1003  | 14    | 84    | 15.01000023 | 14.35999966 | 5.853000164 | 4.160999775 | 4136.5      | 2.359999895 |
| 66  | 100.5         | 27.2         | 1683         | 2       | 149                     | 119  | 48   | 4586 | 250  | 934   | 4     | 97    | 14.05000019 | 4.96999979  | 6.221000195 | 4.131999969 | 1314.150024 | 11.88000011 |
| 67  | 100.53        | 25.2         | 2220         | 2       | 144                     | 112  | 49   | 4123 | 238  | 1020  | 13    | 87    | 14.89000034 | 13.60000038 | 6.247000217 | 4.144999981 | 3907.929932 | 2.880000114 |
| 68  | 100.5867      | 25.22014     | 1841         | 2       | 161                     | 113  | 49   | 4136 | 257  | 978   | 13    | 85    | 14.81000042 | 13.51000023 | 6.15199995  | 4.254000187 | 3903.469971 | 2.950000048 |
| 69  | 100.6         | 26.6         | 2419         | 2       | 122                     | 116  | 49   | 4381 | 220  | 993   | 4     | 102   | 13.19999981 | 10.65999985 | 6.238999844 | 4.625999928 | 2446.77002  | 5.21999979  |
| 70  | 100.6333      | 27.16667     | 2332         | 2       | 137                     | 120  | 49   | 4544 | 238  | 944   | 3     | 101   | 13.72000027 | 5.659999847 | 6.224999905 | 4.402999878 | 1538.189941 | 10.97000027 |
| 71  | 100.7         | 25.16        | 1815         | 2       | 164                     | 113  | 48   | 4117 | 260  | 963   | 13    | 86    | 14.69999981 | 13.57999992 | 5.894000053 | 4.421000004 | 3944.77002  | 2.920000076 |
| 72  | 100.7667      | 25.7         | 1952         | 2       | 161                     | 115  | 48   | 4260 | 260  | 950   | 11    | 88    | 14.15999985 | 12.51000023 | 5.962999821 | 5.236999989 | 3837.850098 | 3.5         |
| 73  | 100.7833      | 26.13333     | 1922         | 2       | 162                     | 117  | 49   | 4330 | 262  | 945   | 9     | 91    | 13.51000023 | 11.93999958 | 6.559000015 | 4.585000038 | 3828.02002  | 3.769999981 |
| 74  | 100.7845      | 27.7098      | 2692         | 2       | 117                     | 127  | 49   | 4755 | 222  | 900   | 3     | 101   | 13.59000015 | 4.510000229 | 6.605000019 | 4.703000069 | 1233.109985 | 12.65999985 |
| 75  | 100.7962      | 27.2971      | 2524         | 2       | 124                     | 122  | 49   | 4603 | 226  | 945   | 3     | 103   | 13.35999966 | 5.960000038 | 6.315999985 | 4.633999825 | 1665.449951 | 10.60000038 |
| 76  | 100.8004      | 25.5118      | 2076         | 2       | 156                     | 114  | 49   | 4193 | 253  | 962   | 11    | 89    | 14.34000015 | 12.84000015 | 5.869999886 | 4.980000019 | 3841.699951 | 3.349999905 |
| 77  | 100.8333      | 25.4         | 2167         | 2       | 149                     | 113  | 48   | 4164 | 245  | 984   | 11    | 89    | 14.39000034 | 13.06000042 | 5.802999973 | 4.827000141 | 3845.120117 | 3.230000019 |
| 78  | 100.8333      | 26.53333     | 2276         | 2       | 142                     | 118  | 48   | 4401 | 243  | 974   | 5     | 99    | 12.77000046 | 11.61999989 | 6.263999939 | 4.809999943 | 2929.47998  | 4.130000114 |
| 79  | 100.9         | 25.15        | 1801         | 2       | 173                     | 114  | 48   | 4136 | 269  | 929   | 12    | 86    | 14.47999954 | 13.47999954 | 5.664999962 | 4.557000016 | 3877        | 3.00999999  |
| 80  | 100.9         | 25.33333     | 2114         | 2       | 153                     | 114  | 48   | 4176 | 250  | 973   | 11    | 89    | 14.34000015 | 13.15999985 | 5.705999851 | 4.763999939 | 3807.419922 | 3.180000067 |
| 81  | 100.9         | 25.7         | 2610         | 2       | 126                     | 114  | 49   | 4173 | 221  | 1024  | 9     | 95    | 13.94999981 | 12.57999992 | 5.874000072 | 5.206999779 | 3719.050049 | 3.440000057 |
| 82  | 101.0167      | 26.41667     | 1849         | 2       | 168                     | 120  | 48   | 4432 | 272  | 927   | 7     | 93    | 12.64000034 | 12.01000023 | 6.407999992 | 4.690000057 | 3217.189941 | 3.720000029 |
| 83  | 101.16667     | 27.33333     | 2695         | 2       | 112                     | 124  | 49   | 4625 | 214  | 979   | 3     | 103   | 12.63000011 | 7.539999962 | 6.267000198 | 4.986000061 | 2029.22998  | 8.630000114 |
| 84  | 101.2631      | 25.15278     | 1878         | 2       | 170                     | 115  | 48   | 4172 | 268  | 914   | 11    | 88    | 14.14000034 | 13.27999973 | 5.375       | 4.732999802 | 3685.23999  | 3.339999914 |
| 85  | 101.2789      | 26.65936     | 1493         | 2       | 187                     | 122  | 48   | 4573 | 294  | 901   | 7     | 92    | 12.52999973 | 10.5        | 6.102000237 | 5.136000156 | 3494.280029 | 5.260000229 |
| 86  | 101.37        | 25.52361     | 2205         | 2       | 152                     | 116  | 48   | 4200 | 250  | 949   | 9     | 93    | 13.81000042 | 12.35000038 | 5.636000156 | 4.863999844 | 3633.929932 | 4.050000191 |
| 87  | 101.5         | 29           | 3336         | 2       | 44                      | 115  | 44   | 5205 | 154  | 744   | 6     | 93    | 13.31999969 | 6.03000021  | 6.480999947 | 5.360000134 | 941.4000244 | 11.72000027 |
| 88  | 101.509       | 29.00745     | 3129         | 2       | 44                      | 115  | 44   | 5205 | 154  | 744   | 6     | 93    | 13.31999969 | 6.03000021  | 6.480999947 | 5.360000134 | 941.4000244 | 11.72000027 |
| 89  | 101.6         | 24.83333     | 1999         | 2       | 165                     | 112  | 48   | 4098 | 259  | 953   | 12    | 88    | 14.22000027 | 13.69999981 | 6.124000072 | 4.164000034 | 3848.25     | 3.170000076 |

Continued Table S1

| No. | Longitude (E) | Latitude (N) | Altitude (m) | TwoStep | Environmental variables |      |      |      |      |       |       |       |             |             |             |             |             |             |
|-----|---------------|--------------|--------------|---------|-------------------------|------|------|------|------|-------|-------|-------|-------------|-------------|-------------|-------------|-------------|-------------|
|     |               |              |              |         | bio1                    | bio2 | bio3 | bio4 | bio5 | bio12 | bio14 | bio15 | wet         | vap         | sph         | sc          | gdd         | frs         |
| 90  | 101.66        | 25.12833     | 1792         | 2       | 175                     | 115  | 48   | 4167 | 273  | 879   | 10    | 89    | 13.84000015 | 13.14999962 | 6.369999886 | 4.195000172 | 3645.449951 | 3.630000114 |
| 91  | 101.85        | 25.65        | 1153         | 2       | 216                     | 126  | 49   | 4433 | 324  | 670   | 5     | 92    | 13.25       | 12.35000038 | 5.931000233 | 4.446000099 | 4103.600098 | 4.039999962 |
| 92  | 101.86667     | 27.5         | 2433         | 2       | 135                     | 121  | 48   | 4678 | 237  | 1036  | 5     | 99    | 12.23999977 | 8.600000381 | 6.217000008 | 4.761000156 | 2374.949951 | 7.369999886 |
| 93  | 101.9122      | 25.19083     | 1750         | 2       | 176                     | 115  | 48   | 4226 | 274  | 866   | 9     | 90    | 13.63000011 | 12.86999989 | 6.714000225 | 4.124000072 | 3538.780029 | 3.900000095 |
| 94  | 102.015       | 26.93038     | 2060         | 2       | 148                     | 122  | 47   | 4778 | 255  | 1073  | 6     | 101   | 11.5        | 12.27999973 | 5.925000191 | 4.672999859 | 3204.48999  | 3.710000038 |
| 95  | 102.033       | 24.13073     | 1595         | 2       | 188                     | 110  | 48   | 4055 | 282  | 984   | 13    | 83    | 14.56999969 | 15.85000038 | 6.103000164 | 3.890000105 | 4413.899902 | 1.429999948 |
| 96  | 102.1018      | 27.87644     | 2118         | 2       | 148                     | 116  | 46   | 4777 | 252  | 1024  | 5     | 95    | 12.5        | 7.980000019 | 6.407999992 | 4.096000195 | 2505.689941 | 8.279999733 |
| 97  | 102.1589      | 24.25606     | 1805         | 2       | 176                     | 109  | 48   | 4070 | 271  | 990   | 13    | 84    | 14.26000023 | 15.31999969 | 5.974999905 | 4.157000065 | 4198.109863 | 1.75        |
| 98  | 102.2114      | 24.20824     | 1343         | 2       | 203                     | 111  | 48   | 4141 | 300  | 901   | 11    | 81    | 14.28999996 | 15.32999992 | 5.979000092 | 4.146999836 | 4191.839844 | 1.730000019 |
| 99  | 102.2333      | 24.83333     | 1706         | 2       | 180                     | 111  | 48   | 4281 | 274  | 895   | 11    | 86    | 13.65999985 | 13.53999996 | 6.552999973 | 4.026000023 | 3558.550049 | 3.25        |
| 100 | 102.2639      | 24.97083     | 1851         | 2       | 167                     | 109  | 47   | 4204 | 261  | 926   | 11    | 88    | 13.56000042 | 13.02000046 | 6.679999828 | 4.102000237 | 3487.580078 | 3.710000038 |
| 101 | 102.2939      | 25.30611     | 1846         | 2       | 164                     | 112  | 47   | 4273 | 260  | 908   | 10    | 91    | 13.36999989 | 12.31999969 | 6.856999874 | 4.249000072 | 3312.070068 | 4.21999979  |
| 102 | 102.3         | 24.73        | 2441         | 2       | 132                     | 105  | 47   | 4138 | 221  | 1073  | 13    | 89    | 13.68000031 | 13.76000023 | 6.410999775 | 4.011000156 | 3573.429932 | 3           |
| 103 | 102.3053      | 24.37861     | 2379         | 2       | 140                     | 105  | 48   | 4007 | 228  | 1101  | 15    | 88    | 13.97999954 | 14.77000046 | 6.070000172 | 4.224999905 | 3941.48999  | 2.099999905 |
| 104 | 102.3167      | 24.5167      | 2382         | 2       | 137                     | 105  | 48   | 4092 | 225  | 1083  | 14    | 88    | 13.80000019 | 14.39999962 | 6.203000069 | 4.149000168 | 3782.409912 | 2.380000114 |
| 105 | 102.4102      | 24.83994     | 1938         | 2       | 161                     | 107  | 47   | 4204 | 252  | 969   | 12    | 88    | 13.56000042 | 13.25       | 6.386000156 | 4.09499979  | 3470.199951 | 3.410000086 |
| 106 | 102.42121     | 27.59382     | 2120         | 2       | 144                     | 115  | 46   | 4833 | 249  | 1026  | 6     | 95    | 12.47000027 | 8.529999733 | 5.965000153 | 4.089000225 | 2375.159912 | 7.599999905 |
| 107 | 102.4828      | 23.8125      | 1401         | 2       | 198                     | 110  | 49   | 4010 | 292  | 1004  | 11    | 84    | 14.57999992 | 15.40999985 | 6.046000004 | 3.674999952 | 4285.540039 | 1.519999981 |
| 108 | 102.4968      | 25.05        | 2269         | 2       | 133                     | 106  | 47   | 4221 | 223  | 1040  | 12    | 90    | 13.40999985 | 12.56999969 | 6.376999855 | 4.277999878 | 3342.929932 | 3.970000029 |
| 109 | 102.5333      | 24.53333     | 2200         | 2       | 146                     | 104  | 47   | 4148 | 235  | 1049  | 14    | 87    | 13.67000008 | 13.97000027 | 6.138999939 | 4.280000021 | 3648.810059 | 2.650000095 |
| 110 | 102.585       | 24.80694     | 1953         | 2       | 161                     | 105  | 47   | 4252 | 251  | 986   | 12    | 86    | 13.51000023 | 13.11999989 | 6.18599987  | 4.138999939 | 3404.77002  | 3.440000057 |
| 111 | 102.62        | 25.86417     | 2156         | 2       | 141                     | 115  | 47   | 4498 | 239  | 952   | 8     | 95    | 13.15999985 | 10.81999969 | 6.073999882 | 4.093999863 | 2926.409912 | 5.380000114 |
| 112 | 102.6226      | 24.96881     | 2185         | 2       | 141                     | 104  | 46   | 4251 | 231  | 1028  | 13    | 89    | 13.42000008 | 12.64000034 | 6.169000149 | 4.289999962 | 3314.679932 | 3.890000105 |
| 113 | 102.6263      | 25.89998     | 2286         | 2       | 132                     | 114  | 47   | 4487 | 230  | 982   | 8     | 96    | 13.15999985 | 10.73999977 | 6.03000021  | 4.117000103 | 2916.050049 | 5.440000057 |
| 114 | 102.8185      | 25.29437     | 2080         | 2       | 146                     | 106  | 46   | 4388 | 239  | 986   | 12    | 89    | 13.35000038 | 11.89999962 | 5.864999771 | 4.604000092 | 3123.840088 | 4.429999828 |
| 115 | 102.8389      | 25.19472     | 1977         | 2       | 150                     | 105  | 46   | 4380 | 242  | 993   | 12    | 88    | 13.35000038 | 12.06000042 | 5.860000134 | 4.638999939 | 3177.050049 | 4.309999943 |
| 116 | 102.892       | 24.92323     | 2057         | 2       | 151                     | 103  | 45   | 4395 | 243  | 1022  | 13    | 87    | 13.38000011 | 12.53999996 | 5.90199995  | 4.455999851 | 3355.840088 | 3.910000086 |
| 117 | 102.892       | 24.99617     | 2071         | 2       | 146                     | 103  | 45   | 4341 | 236  | 1026  | 13    | 88    | 13.34000015 | 12.38000011 | 5.875999928 | 4.518000126 | 3313.439941 | 4.059999943 |
| 118 | 102.9053      | 24.76194     | 2705         | 2       | 113                     | 101  | 46   | 4175 | 200  | 1139  | 13    | 89    | 13.44999981 | 12.85999966 | 5.952000141 | 4.333000183 | 3450.98999  | 3.599999905 |
| 119 | 102.9479      | 25.32931     | 2157         | 2       | 140                     | 106  | 45   | 4425 | 233  | 995   | 11    | 89    | 13.38000011 | 11.73999977 | 5.743000031 | 4.656000137 | 3146.379883 | 4.530000021 |

Continued Table S1

| No. | Longitude (E) | Latitude (N) | Altitude (m) | TwoStep | Environmental variables |      |      |      |      |       |       |       |             |             |             |             |             |             |
|-----|---------------|--------------|--------------|---------|-------------------------|------|------|------|------|-------|-------|-------|-------------|-------------|-------------|-------------|-------------|-------------|
|     |               |              |              |         | bio1                    | bio2 | bio3 | bio4 | bio5 | bio12 | bio14 | bio15 | wet         | vap         | sph         | sc          | gdd         | frs         |
| 120 | 102.95        | 23.88333333  | 2062         | 2       | 156                     | 102  | 47   | 4105 | 247  | 1100  | 13    | 85    | 13.81999969 | 14.84000015 | 5.842000008 | 4.000999928 | 4010.409912 | 1.75        |
| 121 | 102.9825      | 24.44278     | 1682         | 2       | 180                     | 107  | 47   | 4325 | 275  | 951   | 11    | 84    | 13.56000042 | 13.40999985 | 5.93900013  | 4.362999916 | 3771.030029 | 3.049999952 |
| 122 | 102.9975      | 25.1625      | 2029         | 2       | 147                     | 104  | 45   | 4417 | 240  | 1002  | 12    | 88    | 13.35000038 | 12          | 5.731999874 | 4.739999771 | 3261.399902 | 4.329999924 |
| 123 | 103.0181      | 24.26404     | 2475         | 2       | 128                     | 100  | 46   | 4139 | 216  | 1151  | 14    | 87    | 13.60000038 | 13.81999969 | 5.921000004 | 4.256999969 | 3970.330078 | 2.630000114 |
| 124 | 103.1766      | 24.73217     | 1838         | 2       | 161                     | 105  | 45   | 4429 | 256  | 1002  | 13    | 85    | 13.28999996 | 13.18000031 | 5.827000141 | 4.611000061 | 3666.679932 | 3.279999971 |
| 125 | 103.2016      | 24.97649     | 1564         | 2       | 177                     | 108  | 46   | 4532 | 273  | 961   | 11    | 84    | 13.28999996 | 12.65999985 | 5.668000221 | 4.802999973 | 3489.280029 | 3.740000001 |
| 126 | 103.2467      | 25.42306     | 1900         | 2       | 157                     | 108  | 45   | 4566 | 253  | 927   | 11    | 86    | 13.47999954 | 11.75       | 5.43200016  | 4.768000126 | 3159.48999  | 4.400000095 |
| 127 | 103.305       | 24.52444     | 1955         | 2       | 155                     | 105  | 46   | 4376 | 249  | 1014  | 13    | 84    | 13.13000011 | 13.93999958 | 5.797999859 | 4.339000225 | 3894.600098 | 2.599999905 |
| 128 | 103.45984     | 24.16696     | 1552         | 2       | 175                     | 106  | 46   | 4382 | 272  | 944   | 11    | 82    | 13.34000015 | 14.09000015 | 5.919000149 | 4.197000027 | 4032.040039 | 2.279999971 |
| 129 | 103.50151     | 24.21653     | 1733         | 2       | 164                     | 105  | 46   | 4397 | 260  | 979   | 12    | 82    | 13.26000023 | 14.14000034 | 5.953000069 | 4.30700016  | 4014.830078 | 2.25        |
| 130 | 103.5167      | 25.48333     | 2000         | 2       | 152                     | 106  | 44   | 4584 | 247  | 936   | 11    | 84    | 13.61999989 | 11.81999969 | 5.605999947 | 5.146999836 | 3208.459961 | 4.219999979 |
| 131 | 103.8333      | 25.71667     | 1936         | 2       | 155                     | 104  | 44   | 4698 | 249  | 933   | 12    | 84    | 14.13000011 | 11.53999996 | 5.602000237 | 5           | 3230.550049 | 4.329999924 |
| 132 | 103.9333      | 25.83333     | 2078         | 2       | 144                     | 102  | 43   | 4752 | 237  | 972   | 11    | 84    | 14.27999973 | 11.56000042 | 5.590000153 | 4.776000023 | 3060.820068 | 4.239999771 |
| 133 | 103.9861      | 25.71993     | 2149         | 2       | 140                     | 101  | 43   | 4719 | 231  | 1011  | 12    | 83    | 14.28999996 | 11.67000008 | 5.497000217 | 4.822999954 | 3070.310059 | 4.150000095 |
| 134 | 104.0964      | 23.42715     | 1418         | 3       | 173                     | 87   | 42   | 4432 | 263  | 1082  | 12    | 78    | 14.85000038 | 14.69999981 | 5.78399992  | 4.066999912 | 4007.73999  | 1.649999976 |
| 135 | 104.13773     | 24.07135     | 1490         | 3       | 175                     | 101  | 44   | 4638 | 270  | 972   | 13    | 76    | 13.78999996 | 14.22000027 | 5.81099987  | 3.880000114 | 4013.790039 | 2.230000019 |
| 136 | 104.35        | 24.06667     | 1495         | 3       | 171                     | 99   | 43   | 4730 | 266  | 1009  | 14    | 76    | 13.97000027 | 14.35000038 | 5.730000019 | 3.676000118 | 4070.290039 | 2.170000076 |
| 137 | 104.4         | 24.28333     | 1757         | 3       | 157                     | 99   | 43   | 4754 | 252  | 1070  | 16    | 77    | 13.77999973 | 14.5        | 5.758999825 | 3.742000103 | 4101.160156 | 2.200000048 |
| 138 | 104.49344     | 23.69962     | 1536         | 3       | 165                     | 91   | 41   | 4611 | 258  | 1094  | 14    | 78    | 14.56999969 | 14.67000008 | 5.69299984  | 3.757999897 | 4077.310059 | 1.649999976 |
| 139 | 104.6649      | 23.3148      | 1148         | 3       | 184                     | 85   | 40   | 4600 | 279  | 1255  | 12    | 82    | 14.47999954 | 16.32999992 | 5.801000118 | 4.565000057 | 4470.120117 | 0.779999971 |
| 140 | 104.8164      | 23.19861     | 1310         | 3       | 173                     | 82   | 39   | 4596 | 266  | 1365  | 11    | 86    | 14.19999981 | 17.30999947 | 5.801000118 | 4.675000191 | 4743.799805 | 0.460000008 |
| 141 | 105.07669     | 24.0749      | 1270         | 3       | 175                     | 100  | 41   | 5010 | 277  | 1101  | 14    | 78    | 14.14999962 | 15.10999966 | 5.829999924 | 3.595000029 | 4240.140137 | 1.870000005 |
| 142 | 105.1875      | 23.98139     | 1275         | 3       | 175                     | 96   | 40   | 5008 | 276  | 1149  | 14    | 79    | 14.21000004 | 15.18999958 | 5.888999939 | 3.624000072 | 4237.350098 | 1.809999943 |
| 143 | 105.8166667   | 23.78333333  | 864          | 3       | 193                     | 88   | 38   | 5098 | 295  | 1268  | 12    | 84    | 13.67000008 | 16.86000061 | 6.114999771 | 3.694999933 | 4719.379883 | 0.990000001 |
| 144 | 105.95        | 23.93333333  | 762          | 3       | 196                     | 89   | 38   | 5169 | 301  | 1219  | 10    | 84    | 13.52000046 | 16.89999962 | 6.080999851 | 3.676000118 | 4856.259766 | 1.019999981 |
| 145 | 106.15        | 24.7         | 508          | 3       | 219                     | 94   | 37   | 5635 | 335  | 1137  | 9     | 80    | 13.35000038 | 16.84000015 | 5.755000114 | 3.601000071 | 4555.560059 | 1.190000057 |
| 146 | 106.3         | 24.93333333  | 587          | 3       | 199                     | 92   | 36   | 5718 | 315  | 1197  | 10    | 79    | 13.59000015 | 16.56999969 | 5.71600008  | 3.615000001 | 4601.790039 | 1.389999986 |
| 147 | 106.3166667   | 24.81666667  | 908          | 3       | 186                     | 90   | 36   | 5672 | 298  | 1236  | 10    | 80    | 13.46000004 | 16.77000046 | 5.697999954 | 3.572999954 | 4573.870117 | 1.279999971 |
| 148 | 106.5667      | 24.8         | 1174         | 3       | 170                     | 86   | 35   | 5632 | 279  | 1311  | 14    | 78    | 13.39999962 | 17.02000046 | 5.649000168 | 3.628000021 | 4601.149902 | 1.210000038 |
