# Supplementary material for: Impact of Geography and Climate on the Genetic Differentiation of the Subtropical Pine Pinus yunnanensis
Source: PubMed Central journal article supplement (PMC3693954; doi:10.1371/journal.pone.0067345), 2013-06-26
Supplement: pone.0067345.s003.pdf [file pone.0067345.s003.pdf]

Table S2. The frequencies of mitotypes and chlorotypes in the 16 sampled *Pinus yunnanensis* populations.

| Population | Longitude (E) | Latitude (N) | Altitude (m) | mtDNA*   |                      |                      |       |     |     |     |     |     |     |     |     |     |     |     |     |   |
|------------|---------------|--------------|--------------|----------|----------------------|----------------------|-------|-----|-----|-----|-----|-----|-----|-----|-----|-----|-----|-----|-----|---|
|            |               |              |              | <i>N</i> | <i>n<sub>h</sub></i> | <i>H<sub>e</sub></i> | M17   | M18 | M19 | M20 | M21 | M22 | M23 | M24 | M25 | M26 | M27 | M28 | M29 |   |
| 1          | Gongshan      | 98°49'       | 25°58'       | 1616     | 16                   | 2                    | 0.125 | 0   | 0   | 1   | 0   | 0   | 0   | 0   | 15  | 0   | 0   | 0   | 0   | 0 |
| 2          | Tengchong     | 98°39'       | 25°02'       | 1580     | 16                   | 1                    | 0     | 0   | 0   | 0   | 0   | 0   | 0   | 0   | 16  | 0   | 0   | 0   | 0   | 0 |
| 3          | Baoshan       | 99°08'       | 24°28'       | 1897     | 16                   | 2                    | 0.233 | 0   | 0   | 2   | 0   | 0   | 0   | 0   | 14  | 0   | 0   | 0   | 0   | 0 |
| 4          | Zhongdian 1   | 99°32'       | 28°09'       | 3048     | 16                   | 1                    | 0     | 0   | 0   | 0   | 0   | 0   | 0   | 0   | 0   | 16  | 0   | 0   | 0   | 0 |
| 5          | Zhongdian 2   | 100°03'      | 27°11'       | 2009     | 16                   | 3                    | 0.667 | 0   | 0   | 0   | 0   | 0   | 0   | 0   | 8   | 4   | 0   | 4   | 0   | 0 |
| 6          | Lijiang       | 100°13'      | 26°53'       | 2493     | 16                   | 4                    | 0.675 | 0   | 0   | 8   | 1   | 0   | 0   | 0   | 5   | 0   | 0   | 0   | 0   | 2 |
| 7          | Binchuan      | 100°21'      | 25°58'       | 3141     | 16                   | 3                    | 0.700 | 0   | 0   | 4   | 0   | 6   | 0   | 0   | 0   | 0   | 6   | 0   | 0   | 0 |
| 8          | Yuxi          | 102°09'      | 24°15'       | 1849     | 16                   | 7                    | 0.850 | 0   | 1   | 5   | 0   | 0   | 4   | 2   | 2   | 0   | 1   | 0   | 1   | 0 |
| 9          | Shiping       | 102°29'      | 23°43'       | 1428     | 16                   | 3                    | 0.492 | 0   | 1   | 11  | 0   | 0   | 0   | 4   | 0   | 0   | 0   | 0   | 0   | 0 |
| 10         | Jianshui      | 102°57'      | 23°50'       | 2084     | 16                   | 2                    | 0.500 | 0   | 0   | 6   | 0   | 0   | 0   | 10  | 0   | 0   | 0   | 0   | 0   | 0 |
| 11         | Jiulong       | 101°30'      | 29°00'       | 3129     | 16                   | 2                    | 0.458 | 0   | 0   | 11  | 0   | 0   | 0   | 0   | 5   | 0   | 0   | 0   | 0   | 0 |
| 12         | Miyi          | 102°01'      | 26°55'       | 2047     | 15                   | 4                    | 0.467 | 1   | 0   | 11  | 0   | 0   | 0   | 0   | 0   | 0   | 1   | 0   | 2   | 0 |
| 13         | Kunming       | 102°37'      | 24°58'       | 2242     | 16                   | 2                    | 0.325 | 0   | 0   | 13  | 0   | 0   | 0   | 0   | 0   | 0   | 0   | 0   | 3   | 0 |
| 14         | Yiliang       | 103°10'      | 24°43'       | 1846     | 16                   | 2                    | 0.125 | 1   | 0   | 15  | 0   | 0   | 0   | 0   | 0   | 0   | 0   | 0   | 0   | 0 |
| 15         | Luoping       | 104°24'      | 24°17'       | 1643     | 16                   | 2                    | 0.325 | 0   | 3   | 0   | 0   | 0   | 0   | 13  | 0   | 0   | 0   | 0   | 0   | 0 |
| 16         | Leye          | 106°34'      | 24°48'       | 1039     | 16                   | 1                    | 0     | 0   | 0   | 0   | 0   | 0   | 0   | 16  | 0   | 0   | 0   | 0   | 0   | 0 |



Continued Table S2

| Population |             | cpDNA <sup>†</sup> |     |      |      |      |      |      |      |      |      |      |      |      | Population code<br>in Wang <i>et al.</i> 2011 |      |
|------------|-------------|--------------------|-----|------|------|------|------|------|------|------|------|------|------|------|-----------------------------------------------|------|
|            |             | C95                | C97 | C102 | C104 | C111 | C112 | C114 | C120 | C121 | C124 | C125 | C137 | C143 |                                               | C183 |
| 1          | Gongshan    | 0                  | 0   | 0    | 0    | 0    | 0    | 0    | 1    | 0    | 0    | 0    | 0    | 0    | 0                                             | 49   |
| 2          | Tengchong   | 0                  | 0   | 0    | 0    | 0    | 0    | 0    | 0    | 0    | 0    | 0    | 0    | 0    | 0                                             | New  |
| 3          | Baoshan     | 1                  | 1   | 1    | 0    | 0    | 0    | 0    | 0    | 0    | 0    | 0    | 1    | 0    | 0                                             | 50   |
| 4          | Zhongdian 1 | 0                  | 0   | 0    | 1    | 0    | 0    | 0    | 0    | 0    | 0    | 0    | 0    | 0    | 0                                             | 45   |
| 5          | Zhongdian 2 | 0                  | 0   | 0    | 0    | 0    | 0    | 0    | 0    | 0    | 0    | 0    | 0    | 0    | 0                                             | 46   |
| 6          | Lijiang     | 0                  | 0   | 0    | 0    | 1    | 0    | 0    | 0    | 0    | 0    | 1    | 0    | 1    | 0                                             | 47   |
| 7          | Binchuan    | 0                  | 0   | 0    | 0    | 0    | 0    | 0    | 0    | 1    | 1    | 0    | 0    | 0    | 0                                             | 48   |
| 8          | Yuxi        | 0                  | 0   | 0    | 0    | 0    | 0    | 0    | 0    | 0    | 0    | 0    | 0    | 0    | 0                                             | 54   |
| 9          | Shiping     | 0                  | 0   | 0    | 0    | 0    | 0    | 0    | 0    | 0    | 0    | 0    | 0    | 0    | 1                                             | New  |
| 10         | Jianshui    | 0                  | 0   | 0    | 0    | 0    | 0    | 0    | 0    | 0    | 0    | 0    | 0    | 0    | 0                                             | New  |
| 11         | Jiulong     | 0                  | 0   | 0    | 0    | 0    | 0    | 1    | 0    | 0    | 0    | 0    | 0    | 0    | 0                                             | 44   |
| 12         | Miyi        | 0                  | 0   | 0    | 0    | 0    | 0    | 0    | 0    | 0    | 0    | 0    | 0    | 0    | 0                                             | 51   |
| 13         | Kunming     | 0                  | 0   | 0    | 0    | 0    | 1    | 0    | 0    | 0    | 0    | 0    | 0    | 0    | 0                                             | 52   |
| 14         | Yiliang     | 0                  | 0   | 0    | 0    | 0    | 0    | 0    | 0    | 0    | 0    | 0    | 0    | 0    | 0                                             | 53   |
| 15         | Luoping     | 0                  | 0   | 0    | 0    | 1    | 0    | 0    | 0    | 0    | 0    | 0    | 0    | 0    | 0                                             | New  |
| 16         | Leye        | 0                  | 0   | 0    | 0    | 0    | 0    | 0    | 0    | 0    | 0    | 0    | 0    | 0    | 0                                             | New  |

\* Mitotype nomenclature (e.g. M17) follows that in Wang *et al.* 2011.

<sup>†</sup>Chlorotype nomenclature (e.g. C24) follows that in Wang *et al.* 2011; C183 is a new chlorotype detected in this study, its composition of the five SSR site (PCP1289/Pt87268/Pt71936/Pt45002/PCP41131) is 111/158/146/165/134, respectively.

**Reference:** Wang, B., Mao, J.-F., Gao, J., Zhao, W. & Wang, X.-R. (2011) Colonization of the Tibetan Plateau by the homoploid hybrid pine *Pinus densata*. *Molecular Ecology*, 20, 3796-3811.
